# Supplementary material for: Metabolomics Approach Explore Diagnostic Biomarkers and Metabolic Changes in Heat-Stressed Dairy Cows
Source: MDPI journal article supplement (doi:10.3390/ani10101741), 2020-09-25
Supplement: s1 [file s1]

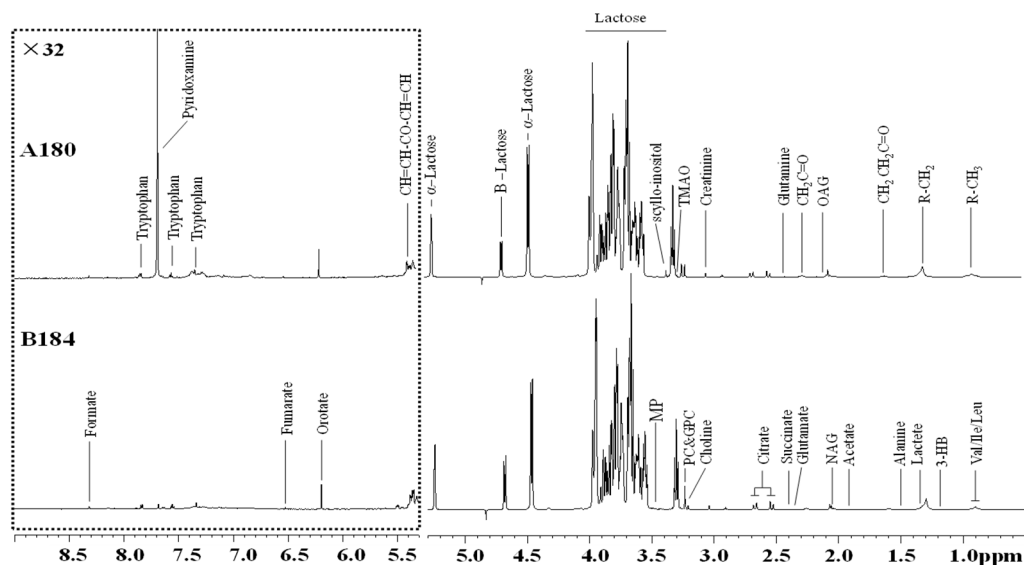

**Figure S1.** A representative 600 MHz <sup>1</sup>H-NMR spectrum ( $\delta$ 0.5–5.0 and  $\delta$ 5.0–9.5) of milk from the HS period and TN period. The region of  $\delta$ 5.3–9.5 (in the dashed box) was magnified 32 times compared with the corresponding region of  $\delta$ 0.5–5.3 for the purpose of clarity. A = Heat Stress group; B = thermal neutral group. 1-MH: 1-Methylhistidine; 3-HB: 3-Hydroxybutyrate; Crea: creatine; Glu: glutamate; GPC: glycerophosphorylcholine; Ile: isoleucine; L1 and L3 lipid: LDL; L2, L4, and L5 lipid: VLDL; L6 lipid:  $-\text{CH}_2-\text{CH}=\text{CH}-$ ; L7 lipid:  $-\text{CH}_2-\text{CH}=\text{CH}-$ ; L8 lipid:  $-\text{CH}_2-\text{C}=\text{O}$ ; L9 lipid:  $=\text{CH}-\text{CH}_2-\text{CH}=\text{CH}-$ ; Leu: leucine; Lys: lysine; NAG: N-acetyl glycoprotein; PC: phosphocholine; Phe: phenylalanine; Val: valine.

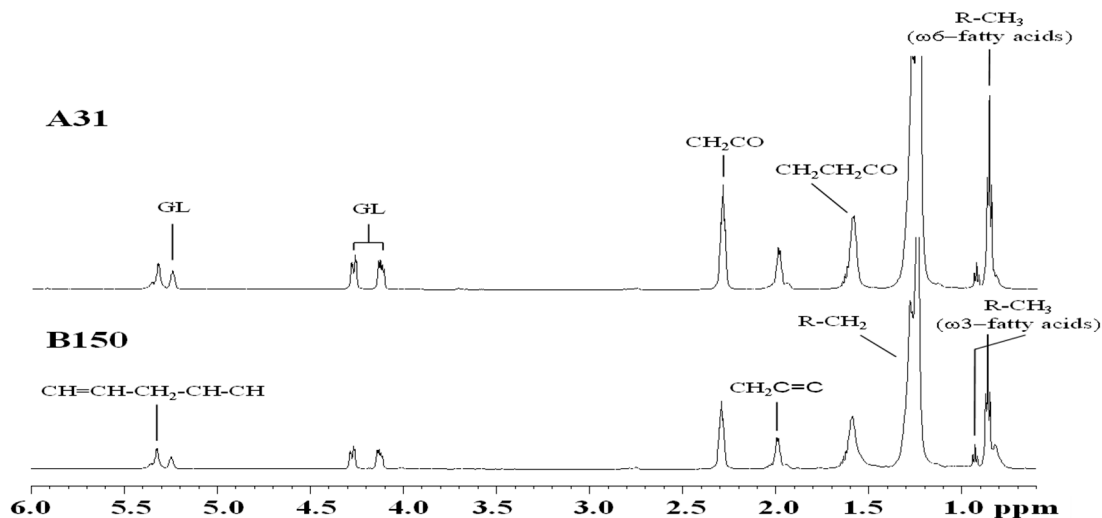

**Figure S2.** 600 MHz <sup>1</sup>H NMR spectra ( $\delta$ 0.5–6.0) of lipid phase of milk extracts from groups A318 and B150. A = Heat Stress group; B = thermal neutral group. GL: Glycerol of lipid.

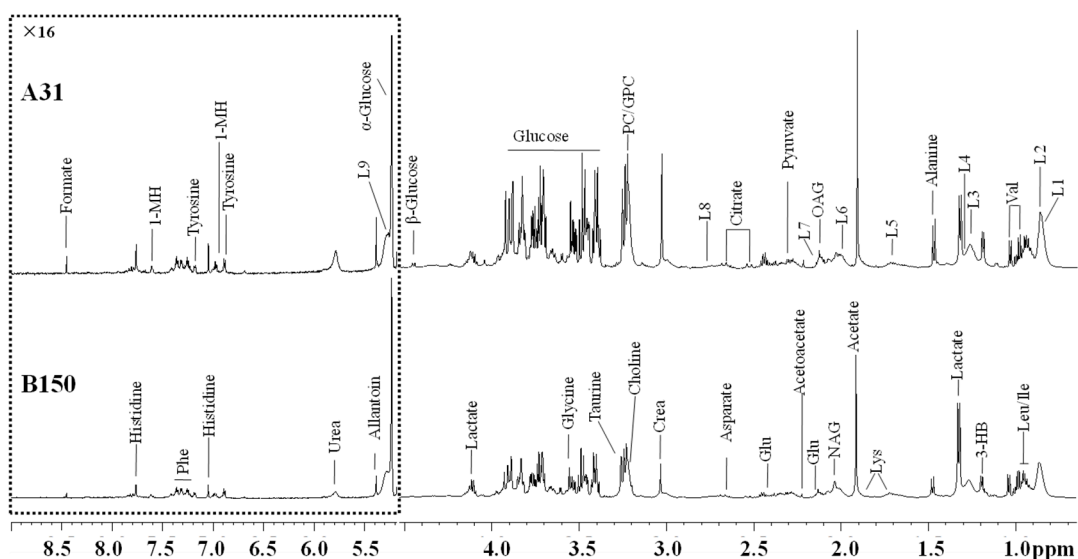

**Figure S3.** A representative 600 MHz  $^1\text{H}$  NMR spectrum ( $\delta 0.5\text{--}5.5$  and  $\delta 5.5\text{--}9.0$ ) of plasma from the HS period and TN period. The region of  $\delta 5.2\text{--}9.0$  (in the dashed box) was magnified 16 times compared with the corresponding region of  $\delta 0.5\text{--}4.6$  for the purpose of clarity. A = Heat Stress group; B = Thermal neutral group. 3-HB: 3-Hydroxybutyrate; GPC: glycerophosphorylcholine; Ile: isoleucine; Leu: leucine; MP: methyl phosphate; NAG: N-acetyl glycoprotein; OAG: O-acetyl glycoprotein; PC: phosphorylcholine; TMAO: trimethylamine N-oxide; Val: valine.

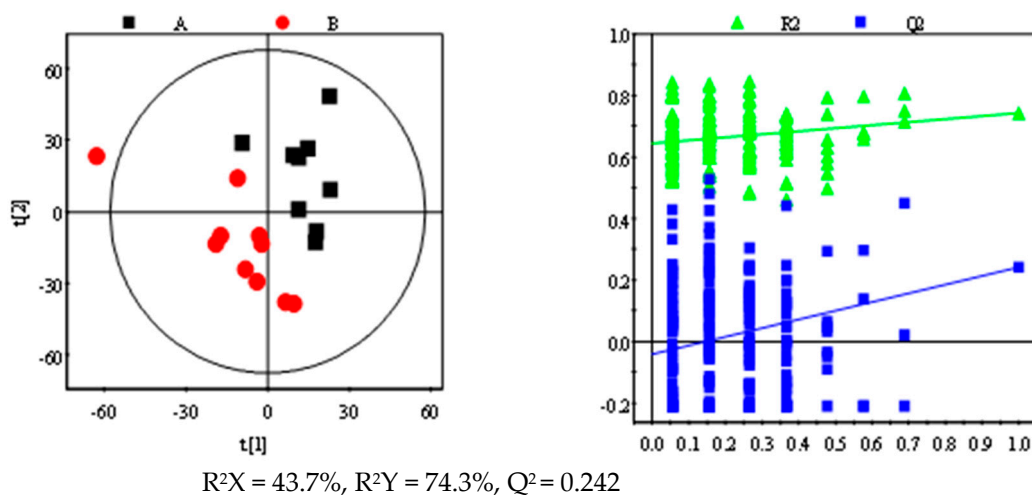

**Figure S4.** Partial least squares discrimination analysis (PLS-DA) score plots (left panel) derived from  $^1\text{H}$  NMR spectra of the aqueous phase of milk extracts. A = Heat Stress group; B = Thermal neutral group.

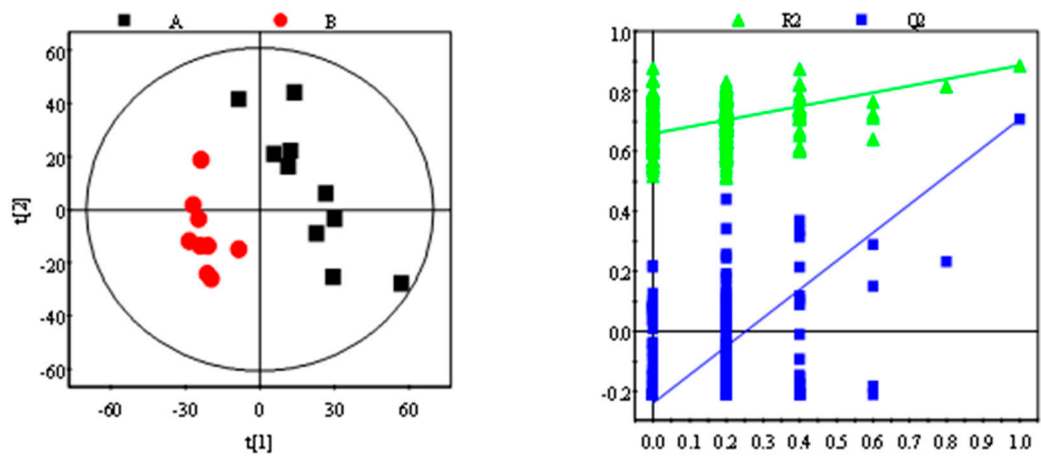

$R^2X = 34.6\%$ ,  $R^2Y = 90.8\%$ ,  $Q^2 = 0.641$

**Figure S5.** Partial least squares discrimination analysis PLS-DA score plots (left panel) derived from  $^1\text{H}$  NMR spectra of serum obtained from different groups and cross validation (left panel) by permutation test ( $n = 300$ ). A = Heat Stress group; B = thermal neutral group.
